# Supplementary material
Source: PubMed Central journal article supplement (PMC4248751)
Supplement: MCB.01075-14_zmb999100645so2.pdf [file MCB.01075-14_zmb999100645so2.pdf]

**Supplemental Table S1.** Raw mass spectrometry data and heatmaps for mock and RNase-treated samples comparison. Heatmaps in sheets “RNase minus heatmap” and “RNase plus heatmap” represent the expanded version of those shown in Fig. 3 to include ribosomal proteins.
