# Supplementary material
Source: PubMed Central journal article supplement (PMC4248751)
Supplement: MCB.01075-14_zmb999100645so3.pdf [file MCB.01075-14_zmb999100645so3.pdf]

Supplementary Table S2. Guide RNA enrichment in affinity purified editing complexes. Read count is provided after filtering raw datasets against nuclear genome of *T. brucei* TREU927 (release 5.0, [www.tritrypdb.org](http://www.tritrypdb.org)). Term: RNA sample was treated with Terminator exonuclease.

| <b>Complex</b> | <b>Sample</b> | <b>Read count</b> | <b>Candidate gRNA read count</b> | <b>Candidate gRNA percentage</b> | <b>Relative enrichment</b> |
|----------------|---------------|-------------------|----------------------------------|----------------------------------|----------------------------|
| GRBC           | Mock          | 3914121           | 157749                           | 3.99                             | significant                |
|                | Term          | 5002206           | 214833                           | 4.25                             | significant                |
| RGG2           | Mock          | 4270129           | 176531                           | 4.10                             | significant                |
|                | Term          | 6065063           | 256843                           | 4.20                             | significant                |
| PAMC1          | Mock          | 4650970           | 190143                           | 4.06                             | significant                |
|                | Term          | 8152879           | 360282                           | 4.39                             | significant                |
| RET2           | Mock          | 956535            | 28618                            | 2.91                             | none                       |
|                | Term          | 2882095           | 48434                            | 1.67                             | none                       |
| Mito RNA       | Mock          | 17024977          | 287178                           | 1.69                             | N/A                        |
|                | Term          | 13788483          | 373389                           | 2.71                             | N/A                        |
